# Supplementary material for: Can we learn to manage stress? A randomized controlled trial carried out on university students
Source: PubMed Central journal article supplement (PMC6124718; doi:10.1371/journal.pone.0200997), 2018-09-05
Supplement: pone.0200997.s005.pdf [file pone.0200997.s005.pdf]

## RÉCÉPISSÉ

**DÉCLARATION NORMALE**

Numéro de déclaration

**1811031 v 0**

du 18 novembre 2014

Madame SALEH Dalia  
UNIVERSITE PARIS OUEST NANTERRE LA  
DEFENSE, L'UFR SPSE  
200 AVENUE REPUBLIQUE, 92001 NANTERRE  
92001 NANTERRE

## ALIRE IMPERATIVEMENT

La délivrance de ce récépissé atteste que vous avez effectué une déclaration de votre traitement à la CNIL et que votre dossier est formellement complet. Vous pouvez mettre en œuvre votre traitement. Cependant, la CNIL peut à tout moment vérifier, par courrier ou par la voie d'un contrôle sur place, que ce traitement respecte l'ensemble des dispositions de la loi du 6 janvier 1978 modifiée en 2004. En tout état de cause, vous êtes tenu de respecter les obligations prévues par la loi et notamment :

- 1) La définition et le respect de la finalité du traitement,
- 2) La pertinence des données traitées,
- 3) La conservation pendant une durée limitée des données,
- 4) La sécurité et la confidentialité des données,
- 5) Le respect des droits des intéressés : information sur leur droit d'accès, de rectification et d'opposition.

**Organisme déclarant****Nom** : UNIVERSITE PARIS OUEST NANTERRE LA DEFENSE, L'UFR  
SPSE**Service** :**Adresse** : 200 AVENUE REPUBLIQUE, 92001 NANTERRE**Code postal** : 92001**Ville** : NANTERRE**N° SIREN ou SIRET** :

199212044 00135

**Code NAF ou APE** :

8542Z

**Tél.** : 08 99 23 66 78**Fax.** :**Traitement déclaré**

**Finalité** : L'ENSEMBLE DE NOS RESULTATS (LE STRESS ET LA DETRESSE PSYCHOLOGIQUE SONT DES DIFFICULTES REPANDUES CHEZ LES ETUDIANTS UNIVERSITAIRES FRANCAIS) NOUS AMENE A CONSIDERER L'INTERET D'ADAPTER UNE INTERVENTION DE GESTION DU STRESS AUPRES DES ETUDIANTS A L'UNIVERSITE, TELLE QUE CELLE VALIDEE AU CANADA PAR MICHELLE DUMONT, QUE NOUS ADAPTONS ET METTONS EN PLACE SUR INTERNET DANS LA SECONDE ETAPE DE CE TRAVAIL. ELLE SE COMPOSE DE QUATRE SEANCES, CHACUNE COMPRENANT QUELQUES EXERCICES PRATIQUES ET UNE

Isabelle FALQUE PIERROTIN  
Présidente
